# Supplementary material
Source: PubMed Central journal article supplement (PMC4442514)
Supplement: JVI.00293-15_zjv999090386so1.pdf [file JVI.00293-15_zjv999090386so1.pdf]

# 1 Supporting Information

## 2 Table S1. Primers for mutagenesis<sup>a</sup>.

| Mutation       | Primer                                                                                                                              |
|----------------|-------------------------------------------------------------------------------------------------------------------------------------|
| l <sub>0</sub> | FW: GCTCTGGCTTGTGCTCTGGCTATGGACGCTCTGGCTCTGGCTGGCACAACCTATGGCATG<br>RV: AGCCAGAGCCAGAGCGTCCATAGCCAGAGCACAAGCCAGAGCGCCTGATGTAACTTCAC |
| N154A          | FW: TCGGAAAACCATGGGGCTTATTCAGCG<br>RV: GCCCCATGGTTTTCCGAAGTGGTGGTT                                                                  |
| BC             | FW: ACGCTGCTGCTGCTGCTCCCTGCAAAATTCCGATT<br>RV: GGAGCAGCAGCAGCAGCGTAGGAGAGTTCAATGAC                                                  |
| DE             | FW: CGGCTGCTGCTGCCGCTTCAAAGGTGCTGGTCGAG<br>RV: GAAGCGGCAGCAGCAGCCGCGACGAAGGGGTTCCAC                                                 |
| FG             | FW: TTGCTGCTGCTGCTGCTCAGATCAACCACCATTGG<br>RV: TGAGCAGCAGCAGCAGCAACTACGATGTAGGAGTC                                                  |
| kl             | FW: TCATCATCAGAGTACTCAAGCTCATCAAAGTCAACATCAGGCCACCTGAAA<br>RV: TGACTTTGATGAGCTTGAGTACTCTGATGATGAGGCTCCTGCCAACGCCTG                  |
| ij             | FW: GGCGGCTGCCACAGCTCAGTCCGTTGTTGCTCTT<br>RV: ACTGAGCTGTGGCAGCCGCCTCTTCAAACCTCCAT                                                   |
| R9A            | FW: CTGGGAATGGCAATGCTGACTTCATA<br>RV: GCATTGCCATTCCCAGACAATTAATA                                                                    |
| E373A          | FW: CAAAGGTGCTGGTCGCGATGGAACCC<br>RV: GCGACCAGCACCTTTGAATTGGCACT                                                                    |
| H144A          | FW: GTTGGCATTGTTGTGGCTGGAACCACC<br>RV: GCCACAAAAATGCCAACTTCGTATTTG                                                                  |
| H319A          | FW: CCGGCGGACACTGGTGCCGGAACAGTT<br>RV: GCACCAGTGTCCGCCGATTTTTTCGCG                                                                  |
| F407A          | FW: ACGCTGGCAAAGCCGCTTCAACAACCT<br>RV: GCGGCTTTGCCAGCGTGCTTCCAGCT                                                                   |
| T410A          | FW: AAAGCCTTTTCAACAGCTTTGAAGGG<br>RV: CTGTTGAAAAGGCTTTGCCAGCGTG                                                                     |
| L221S          | FW: GAATGGTTTTCATGACTCCGCTCTCCCC<br>RV: GAGTCATGAAACCATTCCCTATGGACC                                                                 |
| W217A          | FW: CTGGTCCATAGGGAAGCGTTTCATGAC<br>RV: GCTTCCCTATGGACCAGAAATGACTTT                                                                  |
| Q258A          | FW: GTTGCTCTTGGGTCAGCGGAAGGAGGC<br>RV: GCTGACCCAAGAGCAACAACGGACTGT                                                                  |

3 <sup>a</sup> Pairs of forward (FW) and reverse (RV) primers was used to generate mutations in

4 infectious clone, CprME and prME plasmids.
